# Supplementary material for: Bacillus amyloliquefaciens-9 Reduces Somatic Cell Count and Modifies Fecal Microbiota in Lactating Goats
Source: Mar Drugs. 2021 Jul 21;19(8):404. doi: 10.3390/md19080404 (PMC8400666; doi:10.3390/md19080404)
Supplement: Supplementary file 1 [file marinedrugs-19-00404-s001.zip › Supporting file 1.pdf]

**Table S1. TOP 35 Genus in three groups fed with *Bacillus amyloliquefaciens*-9 (BS), *Radix Tetrastigmae* (RS), and control (CS)**

| Bacterial taxa                          | Group% |         |         | SEM         | P-value  |
|-----------------------------------------|--------|---------|---------|-------------|----------|
|                                         | CS     | BS      | RS      |             |          |
| <i>Firmicutes</i>                       |        |         |         |             |          |
| <i>Dialister</i>                        | 0.0241 | 0.0405  | 0.6381  | 0.009064237 | 0.0014*  |
| <i>Blautia</i>                          | 0.1868 | 0.2608  | 0.8984  | 0.009139154 | 0.8128   |
| <i>unidentified_Ruminococcaceae</i>     | 2.818  | 2.8578  | 2.4198  | 0.006432995 | 0.8188   |
| <i>unidentified_Clostridiales</i>       | 0.558  | 1.037   | 0.7313  | 0.006458744 | 0.8169   |
| <i>Subdoligranulum</i>                  | 0.0376 | 0.0799  | 0.4773  | 0.005862734 | 0.8142   |
| <i>unidentified_Erysipelotrichaceae</i> | 0.0296 | 0.0267  | 0.4163  | 0.005833614 | 0.8144   |
| <i>Lachnoclostridium</i>                | 0.5335 | 0.6034  | 0.8126  | 0.006391016 | 0.8152   |
| <i>Anaerosporobacter</i>                | 0.4496 | 0.464   | 0.497   | 0.002814602 | 0.8163   |
| <i>Butyrivibrio</i>                     | 0.0945 | 0.6542  | 0.2021  | 0.003882475 | 0.8166   |
| <i>Oscillibacter</i>                    | 0.8704 | 0.7447  | 0.6966  | 0.002477579 | 0.4675   |
| <i>Megamonas</i>                        | 0.0084 | 0.0368  | 0.2121  | 0.002552855 | 0.2970   |
| <i>Lactobacillus</i>                    | 0.0004 | 0.1222  | 0.0322  | 0.002415496 | 0.6077   |
| <i>unidentified_Lachnospiraceae</i>     | 0.2266 | 0.3278  | 0.4364  | 0.00202981  | 0.1951   |
| <i>Romboutsia</i>                       | 0.0398 | 0.0966  | 0.2102  | 0.002183952 | 0.3816   |
| <i>Streptococcus</i>                    | 0.012  | 0.0668  | 0.1589  | 0.002235687 | 0.5188   |
| <i>Phascolarctobacterium</i>            | 0.2409 | 0.5949  | 0.3159  | 0.002028095 | <0.0001* |
| <i>Cellulosilyticum</i>                 | 0.0416 | 0.1887  | 0.0716  | 0.001761599 | 0.2532   |
| <i>Faecalibacterium</i>                 | 0.0208 | 0.0434  | 0.1614  | 0.001734701 | 0.2936   |
| <i>Anaerostipes</i>                     | 0.027  | 0.0574  | 0.1317  | 0.001250916 | 0.3154   |
| <i>Butyricicoccus</i>                   | 0.0237 | 0.0366  | 0.1201  | 0.001057539 | 0.1964   |
| <i>Bacteroidetes</i>                    |        |         |         |             |          |
| <i>Bacteroides</i>                      | 3.7902 | 2.848   | 3.4889  | 0.006764765 | 0.0125*  |
| <i>Alistipes</i>                        | 2.5841 | 2.82    | 2.7507  | 0.007313781 | 0.8415   |
| <i>unidentified_Prevotellaceae</i>      | 1.6144 | 0.3048  | 0.2599  | 0.008001492 | 0.0005*  |
| <i>unidentified_Bacteroidales</i>       | 0.4722 | 0.2426  | 0.2405  | 0.00279082  | 0.2442   |
| <i>Alloprevotella</i>                   | 0.3252 | 0.0114  | 0.0185  | 0.003634249 | 0.2184   |
| <i>Proteobacteria</i>                   |        |         |         |             |          |
| <i>Succinivibrio</i>                    | 5.9797 | 16.4733 | 13.9385 | 0.08232045  | 0.0424*  |
| <i>Ruminobacter</i>                     | 3.1997 | 0.2962  | 1.477   | 0.035418085 | 0.3128   |
| <i>unidentified_Enterobacteriaceae</i>  | 0.0551 | 0.3438  | 0.3106  | 0.00478461  | 0.5131   |
| <i>Mailhella</i>                        | 0.4051 | 0.4686  | 0.4041  | 0.001688546 | 0.6980   |
| <i>Fibrobacteres</i>                    |        |         |         |             |          |
| <i>Fibrobacter</i>                      | 2.2797 | 0.1574  | 0.0885  | 0.017645006 | 0.0341*  |
| <i>Verrucomicrobia</i>                  |        |         |         |             |          |
| <i>Akkermansia</i>                      | 0.5883 | 1.1     | 1.9093  | 0.015213114 | 0.3113   |
| <i>Actinobacteria</i>                   |        |         |         |             |          |
| <i>Bifidobacterium</i>                  | 0.0277 | 0.0589  | 0.487   | 0.004582803 | 0.1132   |
| <i>Spirochaetes</i>                     |        |         |         |             |          |
| <i>unidentified_Spirochaetaceae</i>     | 0.0336 | 0.0293  | 0.0791  | 0.000910524 | 0.5403   |
| <i>Euryarchaeota</i>                    |        |         |         |             |          |
| <i>Methanobrevibacter</i>               | 0.3872 | 0.3514  | 0.2512  | 0.002574253 | 0.6348   |
| <i>unidentified_Bacteria</i>            |        |         |         |             |          |
| <i>Campylobacter</i>                    | 0.2014 | 0.0725  | 0.0763  | 0.001454062 | 0.2013   |

\*represents significant differences among the three groups.

**Table S2. All the OTUs in MEpink generated using a weighted gene co-expression network analysis (WGCNA).**

| OTU      | Taxonomy                                                                                                                                             |
|----------|------------------------------------------------------------------------------------------------------------------------------------------------------|
| OTU_17   | <i>k__Bacteria;p__Firmicutes;c__Clostridia;o__Clostridiales;f__Ruminococcaceae</i>                                                                   |
| OTU_19   | <i>k__Bacteria;p__Bacteroidetes;c__Bacteroidia;o__Bacteroidales;f__Prevotellaceae</i>                                                                |
| OTU_26   | <i>k__Bacteria;p__Firmicutes;c__Clostridia;o__Clostridiales;f__Ruminococcaceae;g__s__</i>                                                            |
| OTU_38   | <i>k__Bacteria;p__Bacteroidetes;c__Bacteroidia;o__Bacteroidales;f__Prevotellaceae;g__s__</i>                                                         |
| OTU_48   | <i>k__Bacteria;p__Firmicutes;c__Clostridia;o__Clostridiales;f__unidentified_Clostridiales;g__unidentified_Clostridiales</i>                          |
| OTU_72   | <i>k__Bacteria;p__Bacteroidetes;c__Bacteroidia;o__Bacteroidales;f__Bacteroidaceae;g__Bacteroides</i>                                                 |
| OTU_78   | <i>k__Bacteria;p__Firmicutes;c__Clostridia;o__Clostridiales;f__Ruminococcaceae</i>                                                                   |
| OTU_99   | <i>k__Bacteria;p__Bacteroidetes;c__Bacteroidia;o__Bacteroidales;f__g__s__</i>                                                                        |
| OTU_101  | <i>k__Bacteria;p__Bacteroidetes;c__Bacteroidia;o__Bacteroidales;f__g__s__</i>                                                                        |
| OTU_133  | <i>k__Bacteria;p__Bacteroidetes;c__Bacteroidia;o__Bacteroidales</i>                                                                                  |
| OTU_136  | <i>k__Bacteria;p__Firmicutes;c__Clostridia;o__Clostridiales;f__Lachnospiraceae;g__Blautia;s__</i>                                                    |
| OTU_140  | <i>k__Bacteria;p__Bacteroidetes;c__Bacteroidia;o__Bacteroidales;f__Prevotellaceae;g__Alloprevotella;s__</i>                                          |
| OTU_163  | <i>k__Bacteria;p__Bacteroidetes;c__Bacteroidia;o__Bacteroidales</i>                                                                                  |
| OTU_183  | <i>k__Bacteria;p__Bacteroidetes;c__Bacteroidia;o__Bacteroidales;f__Prevotellaceae;g__unidentified_Prevotellaceae;s__bacterium_P3</i>                 |
| OTU_192  | <i>k__Bacteria;p__Firmicutes</i>                                                                                                                     |
| OTU_196  | <i>k__Bacteria;p__Bacteroidetes;c__Bacteroidia;o__Bacteroidales;f__g__s__</i>                                                                        |
| OTU_235  | <i>k__Bacteria;p__Firmicutes;c__Clostridia;o__Clostridiales;f__Ruminococcaceae;g__s__</i>                                                            |
| OTU_242  | <i>k__Bacteria;p__Bacteroidetes;c__Bacteroidia;o__Bacteroidales;f__Paludibacteraceae;g__s__</i>                                                      |
| OTU_244  | <i>k__Bacteria;p__Tenericutes;c__Mollicutes;o__f__g__s__</i>                                                                                         |
| OTU_248  | <i>k__Bacteria;p__Firmicutes;c__Clostridia;o__Clostridiales</i>                                                                                      |
| OTU_282  | <i>k__Bacteria;p__Bacteroidetes;c__Bacteroidia;o__Bacteroidales;f__Rikenellaceae;g__s__</i>                                                          |
| OTU_285  | <i>k__Bacteria;p__Firmicutes;c__Clostridia;o__Clostridiales;f__Ruminococcaceae;g__unidentified_Ruminococcaceae</i>                                   |
| OTU_293  | <i>k__Bacteria;p__Spirochaetes;c__Spirochaetia;o__Spirochaetales;f__Spirochaetaceae;g__s__</i>                                                       |
| OTU_308  | <i>k__Bacteria;p__Spirochaetes;c__Spirochaetia;o__Spirochaetales;f__Spirochaetaceae;g__s__</i>                                                       |
| OTU_345  | <i>k__Bacteria;p__Bacteroidetes;c__Bacteroidia;o__Bacteroidales;f__Muribaculaceae;g__s__</i>                                                         |
| OTU_380  | <i>k__Bacteria;p__Bacteroidetes;c__Bacteroidia;o__Bacteroidales;f__Barnesiellaceae;g__s__</i>                                                        |
| OTU_409  | <i>k__Bacteria;p__Firmicutes;c__Clostridia;o__Clostridiales</i>                                                                                      |
| OTU_434  | <i>k__Bacteria;p__Bacteroidetes;c__Bacteroidia;o__Bacteroidales;f__Muribaculaceae;g__s__</i>                                                         |
| OTU_458  | <i>k__Bacteria;p__Firmicutes;c__Clostridia;o__Clostridiales;f__Ruminococcaceae</i>                                                                   |
| OTU_467  | <i>k__Bacteria;p__Bacteroidetes;c__Bacteroidia;o__Bacteroidales</i>                                                                                  |
| OTU_480  | <i>k__Bacteria;p__Firmicutes;c__Clostridia;o__Clostridiales;f__Ruminococcaceae</i>                                                                   |
| OTU_491  | <i>k__Bacteria;p__Firmicutes;c__Clostridia;o__Clostridiales;f__Ruminococcaceae</i>                                                                   |
| OTU_515  | <i>k__Bacteria;p__Bacteroidetes;c__Bacteroidia;o__Bacteroidales;f__Muribaculaceae;g__s__</i>                                                         |
| OTU_538  | <i>k__Bacteria;p__Firmicutes;c__Clostridia;o__Clostridiales;f__Ruminococcaceae</i>                                                                   |
| OTU_552  | <i>k__Bacteria;p__Bacteroidetes;c__Bacteroidia</i>                                                                                                   |
| OTU_555  | <i>k__Bacteria;p__Firmicutes;c__Clostridia;o__Clostridiales;f__Ruminococcaceae;g__s__</i>                                                            |
| OTU_587  | <i>k__Bacteria;p__Firmicutes;c__Clostridia;o__Clostridiales;f__Lachnospiraceae;g__unidentified_Lachnospiraceae</i>                                   |
| OTU_595  | <i>k__Bacteria;p__Firmicutes;c__Clostridia;o__Clostridiales;f__Lachnospiraceae;g__Roseburia</i>                                                      |
| OTU_604  | <i>k__Bacteria;p__Firmicutes;c__Clostridia;o__Clostridiales</i>                                                                                      |
| OTU_654  | <i>k__Bacteria;p__Firmicutes;c__Erysipelotrichia;o__Erysipelotrichales;f__Erysipelotrichaceae</i>                                                    |
| OTU_696  | <i>k__Bacteria;p__Firmicutes;c__Clostridia;o__Clostridiales</i>                                                                                      |
| OTU_743  | <i>k__Bacteria;p__Firmicutes;c__Erysipelotrichia;o__Erysipelotrichales;f__Erysipelotrichaceae</i>                                                    |
| OTU_752  | <i>k__Bacteria;p__Firmicutes;c__Clostridia;o__Clostridiales;f__Lachnospiraceae</i>                                                                   |
| OTU_754  | <i>k__Bacteria;p__Firmicutes;c__Clostridia;o__Clostridiales;f__Lachnospiraceae;g__s__</i>                                                            |
| OTU_761  | <i>k__Bacteria;p__Proteobacteria;c__Alphaproteobacteria;o__Rhodospirillales;f__g__s__</i>                                                            |
| OTU_782  | <i>k__Bacteria;p__Firmicutes;c__Clostridia;o__Clostridiales;f__Ruminococcaceae</i>                                                                   |
| OTU_835  | <i>k__Bacteria;p__Firmicutes;c__Clostridia;o__Clostridiales;f__Ruminococcaceae</i>                                                                   |
| OTU_838  | <i>k__Bacteria;p__Firmicutes;c__Clostridia;o__Clostridiales;f__unidentified_Clostridiales;g__Anaerovorax</i>                                         |
| OTU_898  | <i>k__Bacteria;p__Firmicutes;c__Clostridia;o__Clostridiales</i>                                                                                      |
| OTU_900  | <i>k__Bacteria;p__Firmicutes;c__Clostridia;o__Clostridiales;f__Lachnospiraceae;g__Acetitomaculum;s__</i>                                             |
| OTU_916  | <i>k__Bacteria;p__Tenericutes;c__Mollicutes;o__Anaeroplasmatales;f__Anaeroplasmataceae;g__Anaeroplasma;s__</i>                                       |
| OTU_921  | <i>k__Bacteria;p__Bacteroidetes;c__Bacteroidia;o__Bacteroidales;f__Rikenellaceae;g__Alistipes</i>                                                    |
| OTU_923  | <i>k__Bacteria;p__Proteobacteria;c__Gammaproteobacteria;o__unidentified_Gammaproteobacteria;f__Burkholderiaceae;g__Sutterella</i>                    |
| OTU_939  | <i>k__Bacteria;p__Firmicutes;c__Clostridia;o__Clostridiales;f__Lachnospiraceae;g__s__</i>                                                            |
| OTU_949  | <i>k__Bacteria;p__Firmicutes;c__Clostridia;o__Clostridiales;f__Ruminococcaceae;g__Caproiciproducens;s__</i>                                          |
| OTU_993  | <i>k__Bacteria;p__Firmicutes;c__Clostridia;o__Clostridiales;f__Ruminococcaceae;g__unidentified_Ruminococcaceae;s__Clostridiales_bacterium_NK3B98</i> |
| OTU_1012 | <i>k__Bacteria;p__Firmicutes;c__Erysipelotrichia;o__Erysipelotrichales;f__Erysipelotrichaceae</i>                                                    |
| OTU_1032 | <i>k__Bacteria;p__Firmicutes;c__Erysipelotrichia;o__Erysipelotrichales;f__Erysipelotrichaceae;g__Breznakia;s__</i>                                   |
| OTU_1047 | <i>k__Bacteria;p__Firmicutes;c__Clostridia;o__Clostridiales;f__Lachnospiraceae;g__Lachnoclostridium;s__[Clostridium]_scindens</i>                    |
| OTU_1091 | <i>k__Bacteria;p__Firmicutes;c__Clostridia;o__Clostridiales;f__Christensenellaceae;g__unidentified_Christensenellaceae</i>                           |

| OTU      | Taxonomy                                                                                                                                                     |
|----------|--------------------------------------------------------------------------------------------------------------------------------------------------------------|
| OTU_1116 | k__Bacteria;p__Firmicutes;c__Clostridia;o__Clostridiales                                                                                                     |
| OTU_1148 | k__Bacteria;p__Firmicutes;c__Clostridia;o__Clostridiales;f__unidentified_Clostridiales;g__unidentified_Clostridiales;s__bacterium_LD2013                     |
| OTU_1368 | k__Bacteria;p__Bacteroidetes;c__Bacteroidia;o__Bacteroidales;f__Muribaculaceae;g__s__                                                                        |
| OTU_1373 | k__Bacteria;p__Bacteroidetes;c__Bacteroidia;o__Bacteroidales                                                                                                 |
| OTU_1374 | k__Bacteria;p__Tenericutes;c__Mollicutes                                                                                                                     |
| OTU_1408 | k__Bacteria;p__Firmicutes;c__Clostridia;o__Clostridiales;f__Eubacteriaceae;g__Pseudoramibacter;s__                                                           |
| OTU_1410 | k__Bacteria;p__Proteobacteria;c__Gammaproteobacteria;o__Enterobacteriales;f__Enterobacteriaceae                                                              |
| OTU_1427 | k__Bacteria;p__Firmicutes;c__Erysipelotrichia;o__Erysipelotrichales;f__Erysipelotrichaceae;g__Candidatus_Stoquefichus                                        |
| OTU_1431 | k__Bacteria;p__Firmicutes;c__Clostridia;o__Clostridiales;f__Lachnospiraceae                                                                                  |
| OTU_1449 | k__Bacteria;p__Actinobacteria;c__Coriobacteriia;o__Coriobacteriales;f__Eggerthellaceae;g__Senegalimassilia;s__                                               |
| OTU_1472 | k__Bacteria;p__Proteobacteria;c__Deltaproteobacteria;o__Desulfovibrionales;f__Desulfovibrionaceae;g__Bilophila                                               |
| OTU_1486 | k__Bacteria;p__Firmicutes;c__Clostridia;o__Clostridiales;f__Peptococcaceae;g__s__                                                                            |
| OTU_1487 | k__Bacteria;p__Firmicutes;c__Clostridia;o__Clostridiales;f__Ruminococcaceae                                                                                  |
| OTU_1489 | k__Bacteria;p__Firmicutes;c__Bacilli;o__Lactobacillales;f__Leuconostocaceae;g__Weissella;s__Weissella_cibaria                                                |
| OTU_1503 | k__Bacteria;p__Bacteroidetes;c__Bacteroidia;o__Bacteroidales;f__Rikenellaceae;g__s__                                                                         |
| OTU_1532 | k__Bacteria;p__Verrucomicrobia;c__Verrucomicrobiae;o__Opitutales;f__Puniceicoccaceae                                                                         |
| OTU_1545 | k__Bacteria;p__Firmicutes;c__Clostridia;o__Clostridiales;f__Ruminococcaceae;g__unidentified_Ruminococcaceae;s__Clostridiales_bacterium_canine_oral_taxon_123 |
| OTU_1559 | k__Bacteria;p__Lentisphaerae;c__Lentisphaeria;o__Victivallales;f__Victivallaceae                                                                             |
| OTU_1563 | k__Bacteria;p__Firmicutes;c__Clostridia;o__Clostridiales;f__Christensenellaceae;g__s__                                                                       |
| OTU_1632 | k__Bacteria;p__Proteobacteria;c__Gammaproteobacteria;o__Pasteurellales;f__Pasteurellaceae;g__Actinobacillus;s__Bisgaard_Taxon_10                             |
| OTU_1649 | k__Bacteria;p__unidentified_Bacteria;c__unidentified_Bacteria;o__unidentified_Bacteria;f__unidentified_Bacteria;g__Candidatus_Saccarimonas;s__               |
| OTU_1675 | k__Bacteria;p__Firmicutes;c__Clostridia;o__Clostridiales;f__Lachnospiraceae;g__s__                                                                           |
| OTU_1687 | k__Bacteria                                                                                                                                                  |
| OTU_1692 | k__Bacteria;p__Bacteroidetes;c__Bacteroidia;o__Bacteroidales;f__Prevotellaceae                                                                               |
| OTU_1718 | k__Bacteria;p__Firmicutes;c__Clostridia;o__Clostridiales;f__Ruminococcaceae                                                                                  |
| OTU_1775 | k__Bacteria;p__Tenericutes;c__Mollicutes;o__f__g__s__                                                                                                        |
| OTU_1900 | k__Bacteria;p__Firmicutes;c__Clostridia;o__Clostridiales;f__Lachnospiraceae                                                                                  |
| OTU_1988 | k__Bacteria;p__Actinobacteria;c__Coriobacteriia;o__Coriobacteriales                                                                                          |
| OTU_2026 | k__Bacteria;p__Firmicutes;c__Clostridia;o__Clostridiales;f__Ruminococcaceae;g__Oscillibacter;s__                                                             |
| OTU_2054 | k__Bacteria;p__Firmicutes;c__Clostridia;o__Clostridiales;f__Ruminococcaceae;g__s__                                                                           |
| OTU_2088 | k__Bacteria;p__Proteobacteria;c__Alphaproteobacteria;o__Rhodospirillales;f__g__s__                                                                           |

**Table S3. Nutrient compositions of the basal diet**

| Items                             | Experimental diets |
|-----------------------------------|--------------------|
| <i>Ingredient (of DM basis %)</i> |                    |
| Whole corn silage                 | 34.3               |
| Alfalfa hay                       | 20.1               |
| Corn                              | 27.8               |
| Wheat bran                        | 12.6               |
| Soya bean meal                    | 3.2                |
| Premix                            | 1.2                |
| NaCl                              | 0.3                |
| NaHCO <sub>3</sub>                | 0.5                |
| Total                             | 100                |
| <i>Nutrient composition</i>       |                    |
| Dry matter (%)                    | 47.9               |
| Crude protein (%)                 | 10.4               |
| Ether extract (%)                 | 3.4                |
| Crude fibre (%)                   | 18.5               |
| Neutral detergent fibre (%)       | 44.6               |
| Acid detergent fibre (%)          | 23.7               |
| Ash (%)                           | 4.1                |
